# Supplementary material for: Presence of a widely disseminated Listeria monocytogenes serotype 4b clone in India
Source: PubMed Central journal article supplement (PMC4932648; doi:10.1038/emi.2016.55), 2016-06-08
Supplement: emi201655x3.pdf [file emi201655x3.pdf]

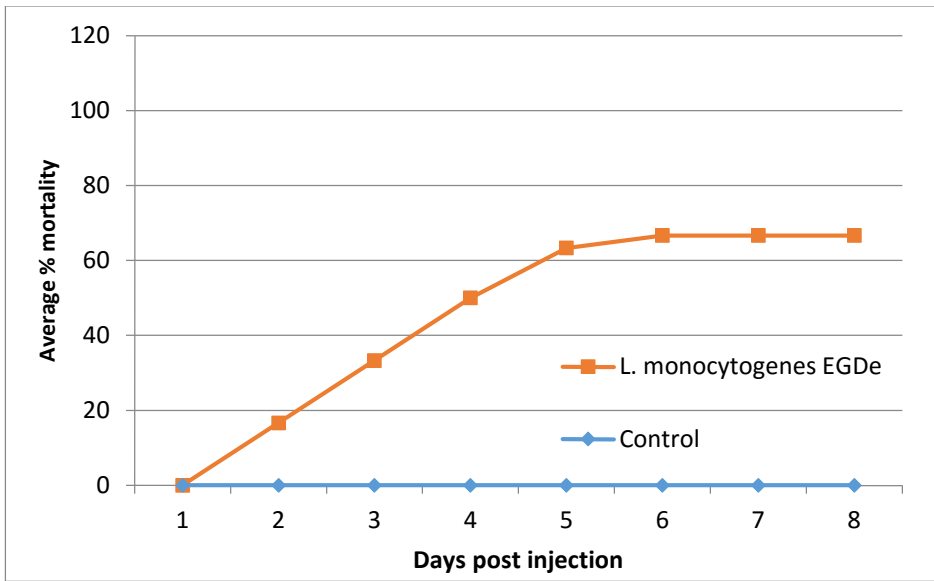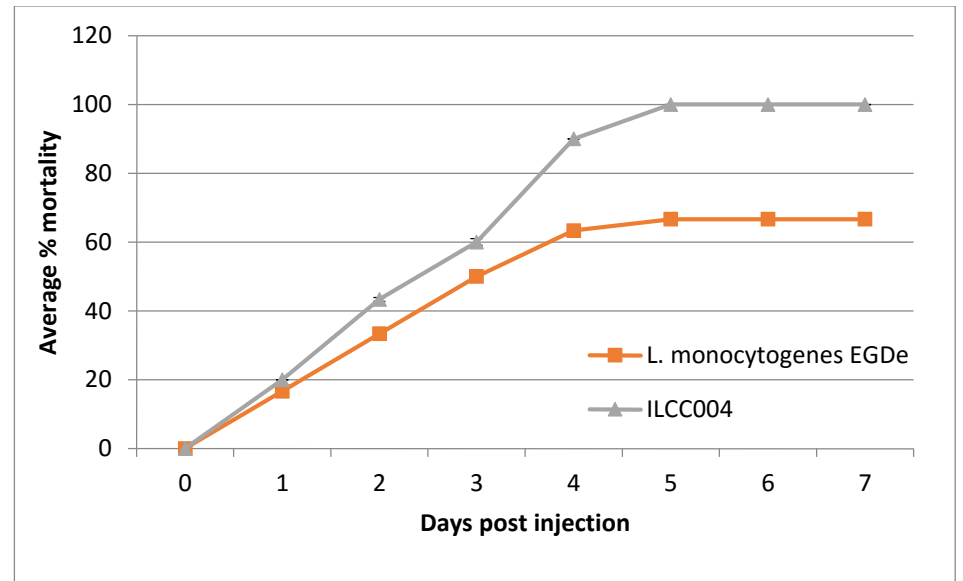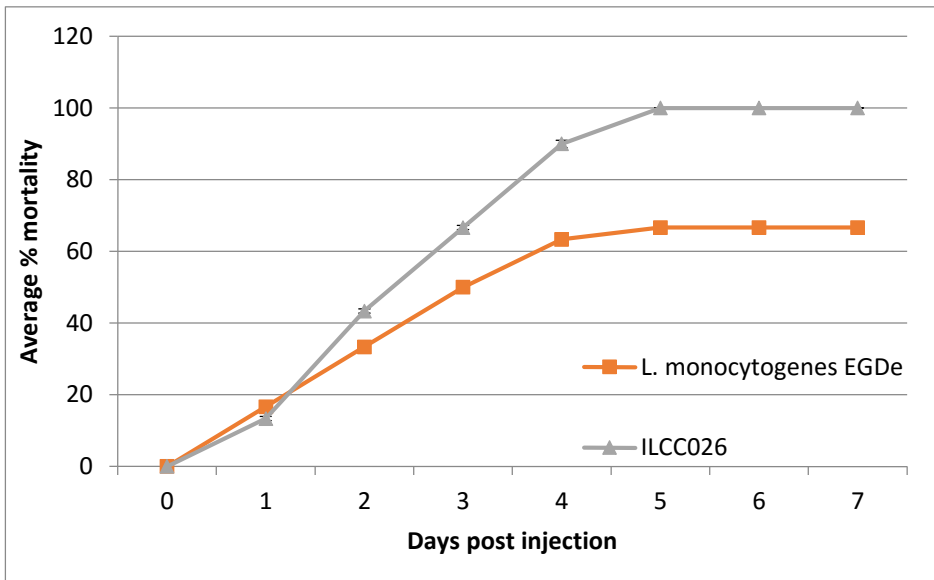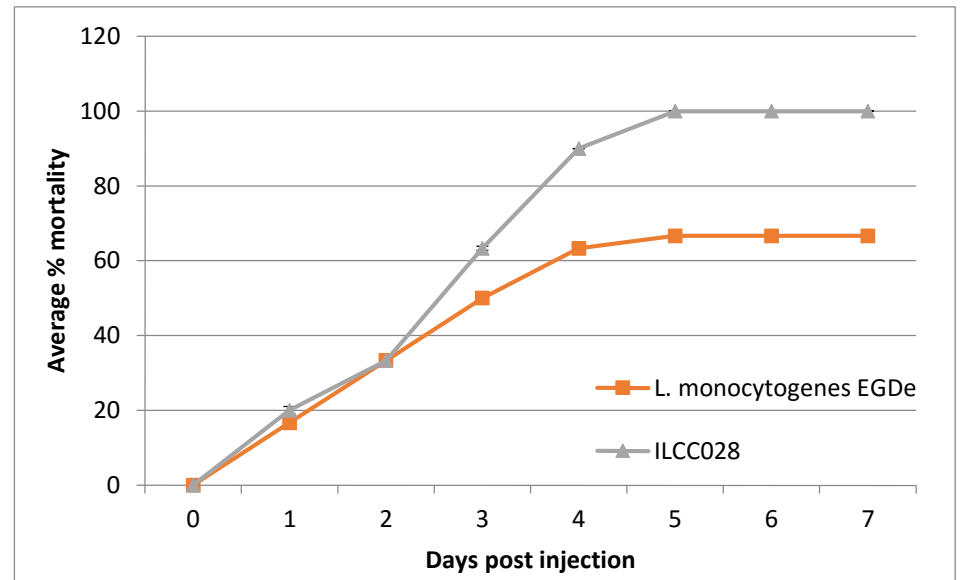

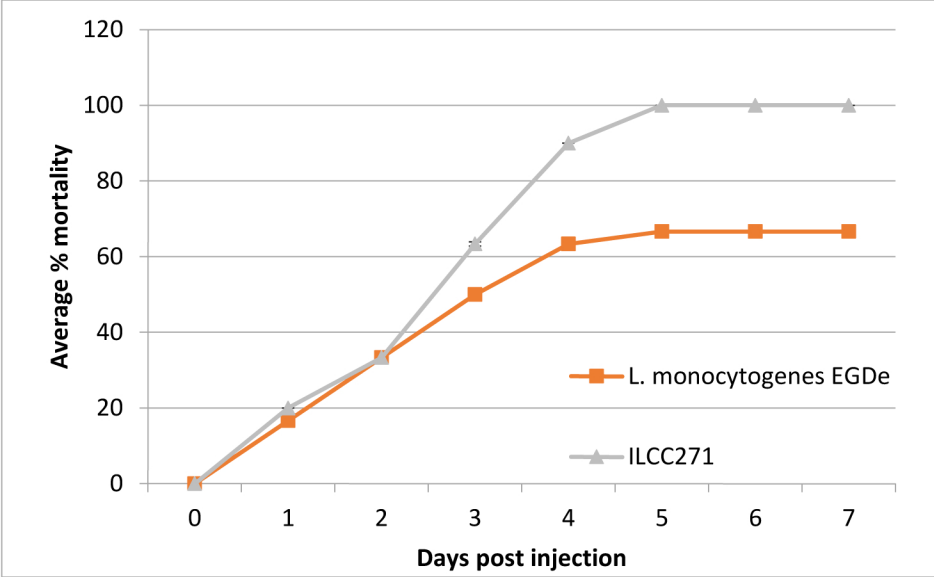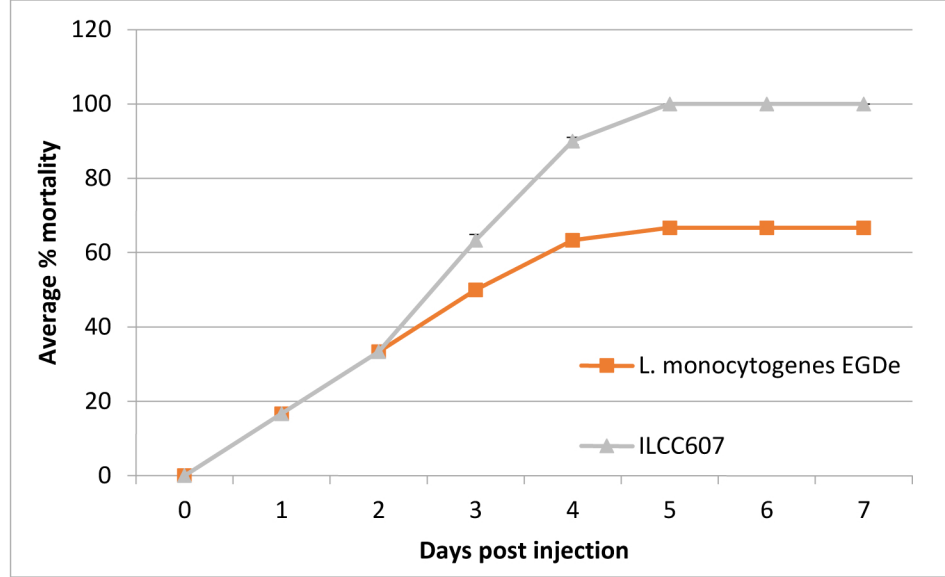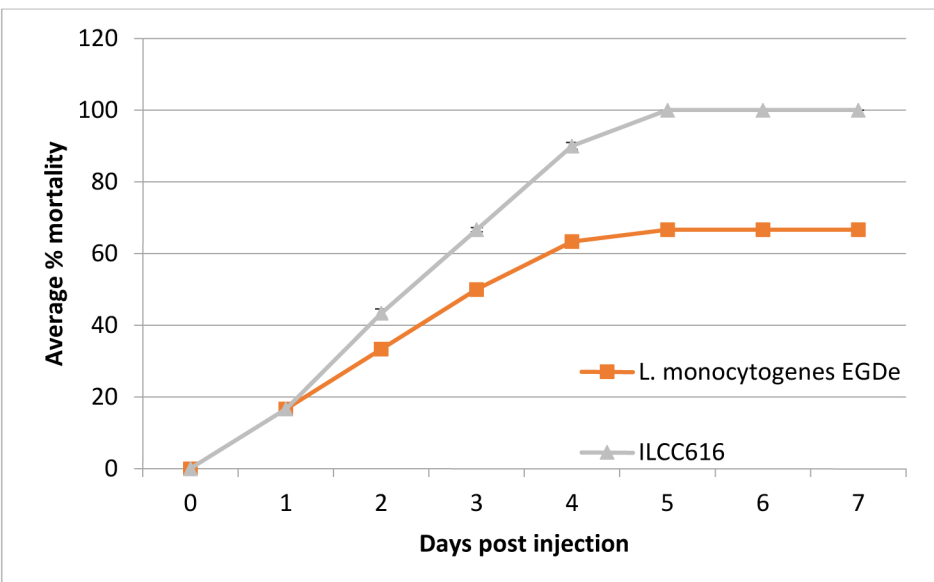

**Supplementary Figure S2** Galleria mellonella mortality chart of six of the clonal *L. monocytogenes* Indian strains compared with the standard *L. monocytogenes* EGD-e strain. The six representative *L. monocytogenes* strains with similar pulsotypes were studied as described by Mukherjee et al. (2010). In brief, ten Galleria larvae per strain were infected with 10<sup>6</sup> CFU/larvae and observed for mortality for up to 7 days. The experiment was repeated three times, and the average % mortality was calculated. All six of the studied clonal *L. monocytogenes* 4b serotype strains were similar in terms of their mortality rates, which were ~20% greater than that of *L. monocytogenes* EGD-e.
