# Supplementary material for: Presence of a widely disseminated Listeria monocytogenes serotype 4b clone in India
Source: PubMed Central journal article supplement (PMC4932648; doi:10.1038/emi.2016.55), 2016-06-08
Supplement: emi201655x4.pdf [file emi201655x4.pdf]

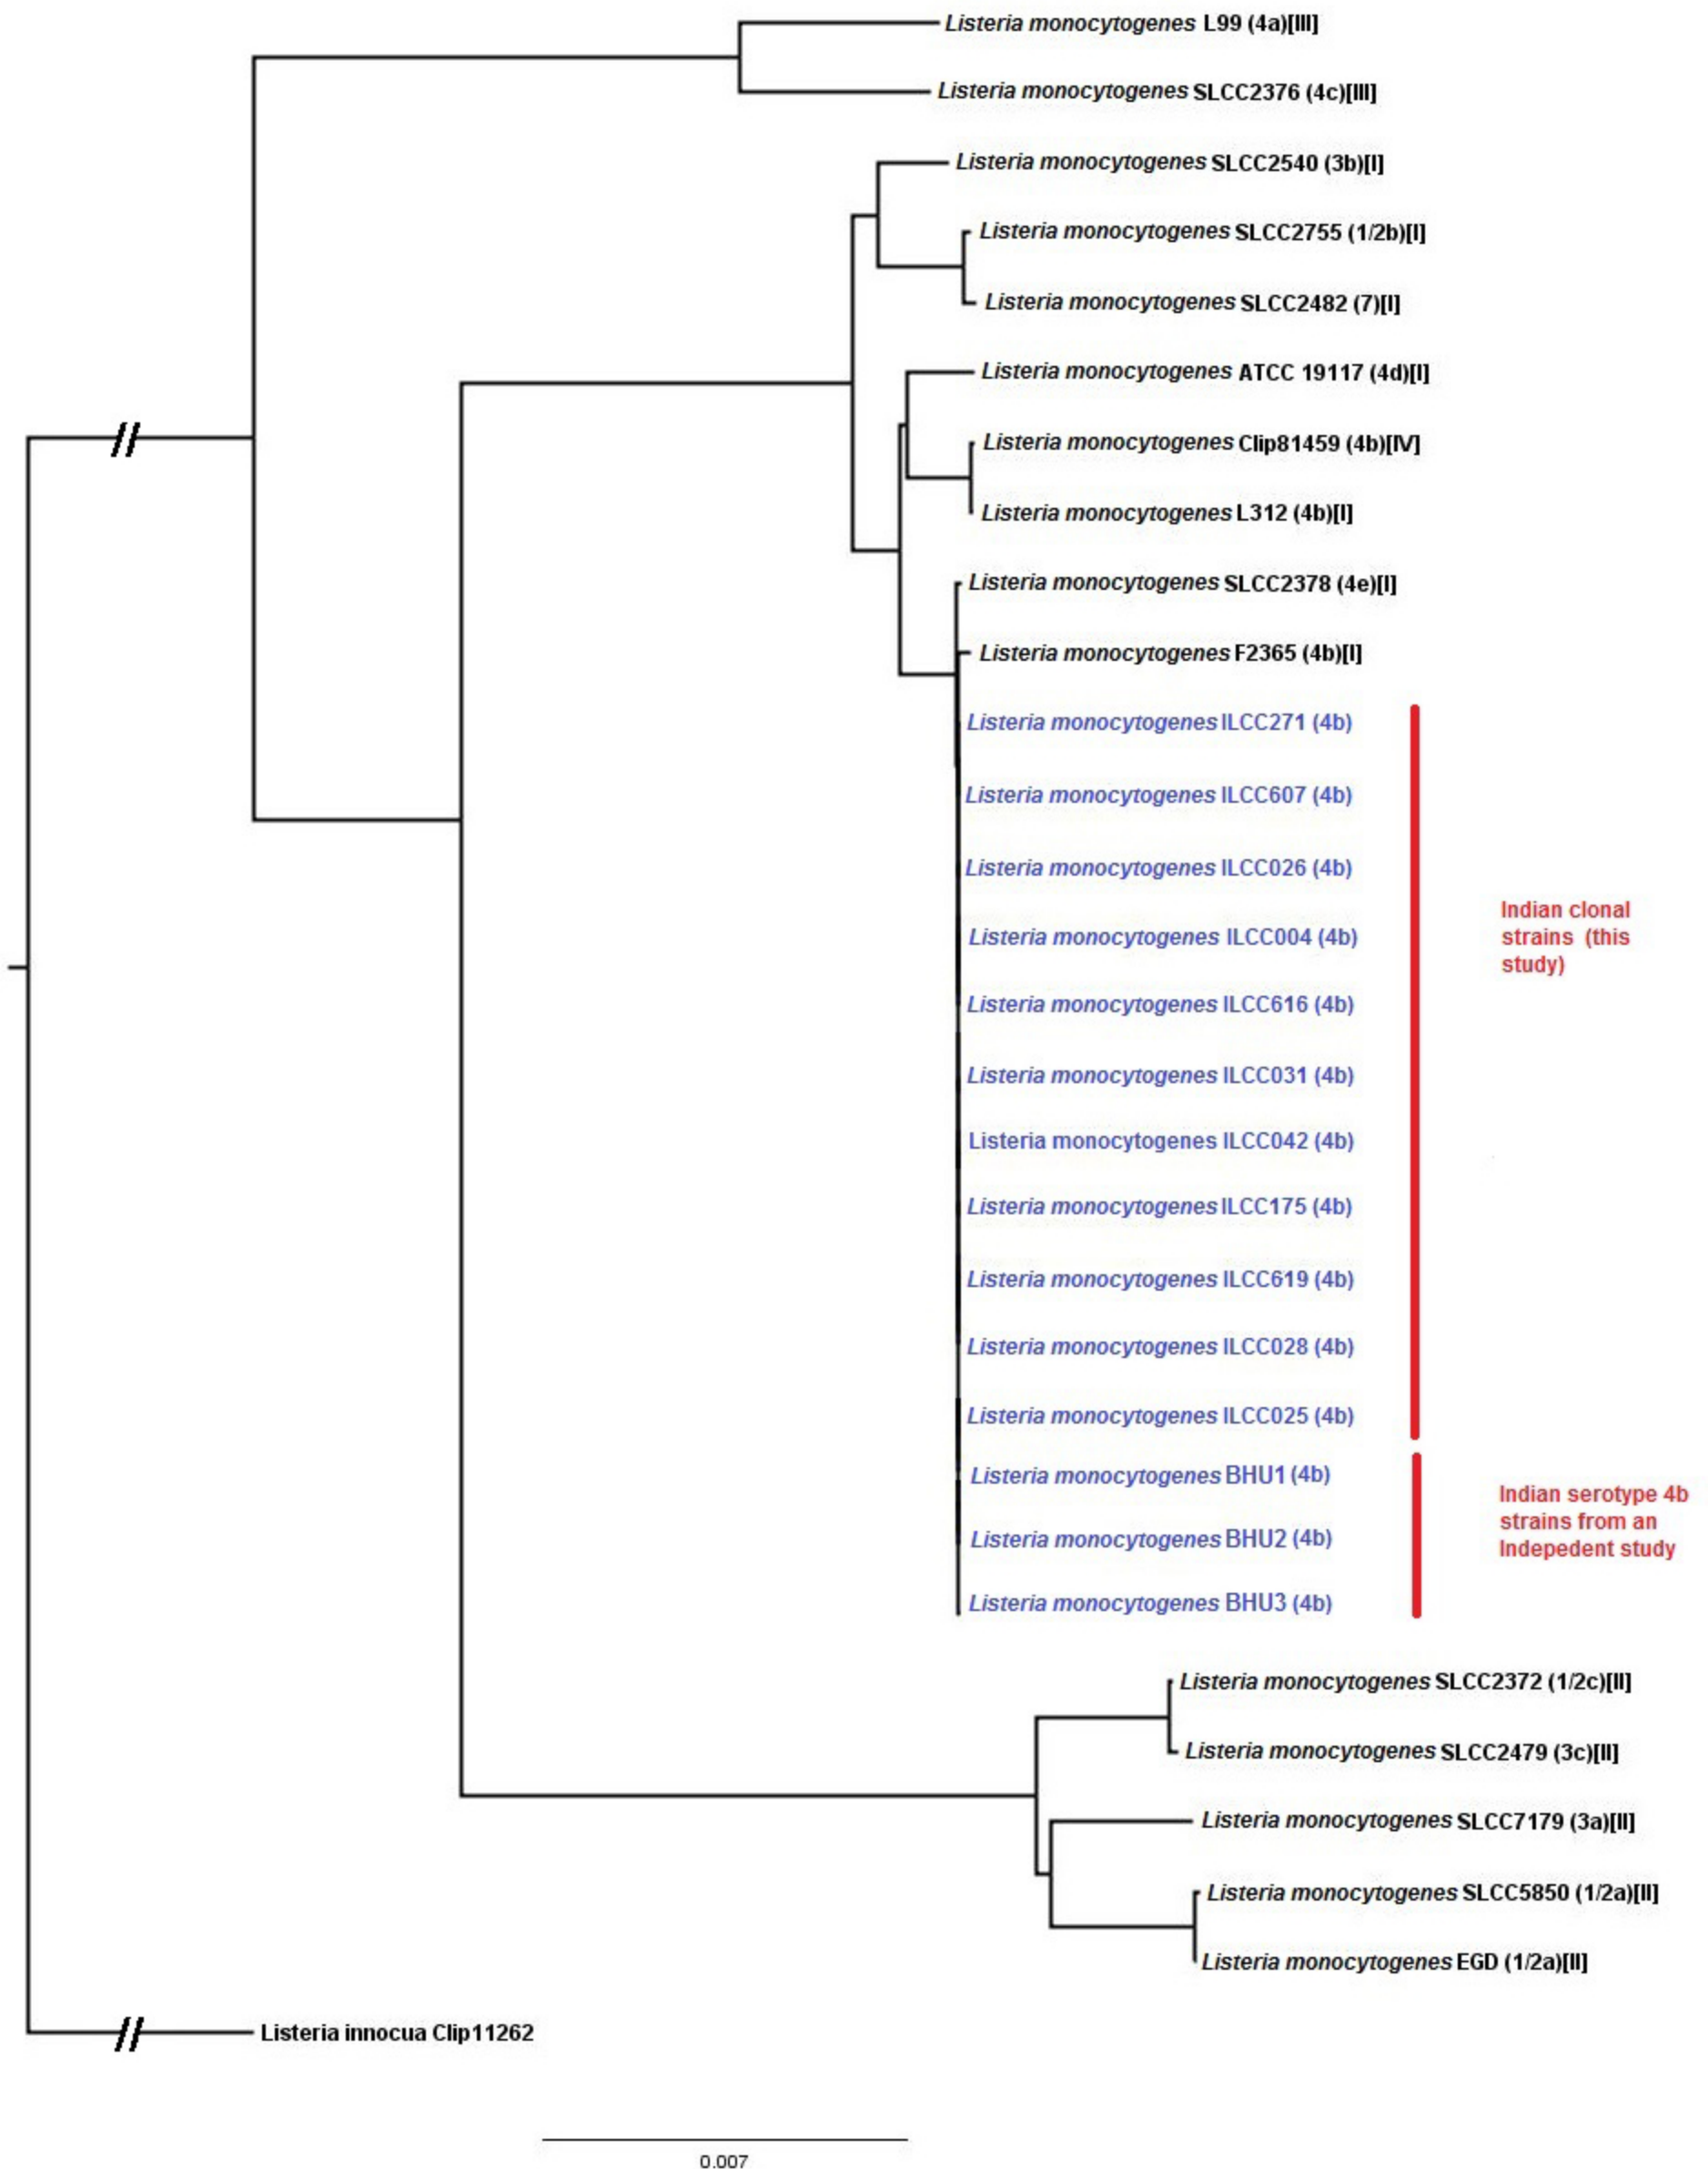

**Supplementary Figure S3.** Neighbor-joining tree based on the alignments of 2401 mutually conserved core genes (amino acid identity >60%, coverage >80%) of *L. monocytogenes*, including representative strains from every serotype and lineage. The 11 studied representative *L. monocytogenes* serotype 4b strains from India were observed to be closely related to the outbreak-associated *L. monocytogenes* F2365 strain that was involved in a cheese outbreak in 1986/7 in the USA. Three *L. monocytogenes* serotype 4b strains (labeled as BHU01-03) from the independent study from India were included for comparison purposes and found to be identical to the 11 studied strains and F2365.
