# Supplementary material for: Presence of a widely disseminated Listeria monocytogenes serotype 4b clone in India
Source: PubMed Central journal article supplement (PMC4932648; doi:10.1038/emi.2016.55), 2016-06-08
Supplement: emi201655x5.pdf [file emi201655x5.pdf]

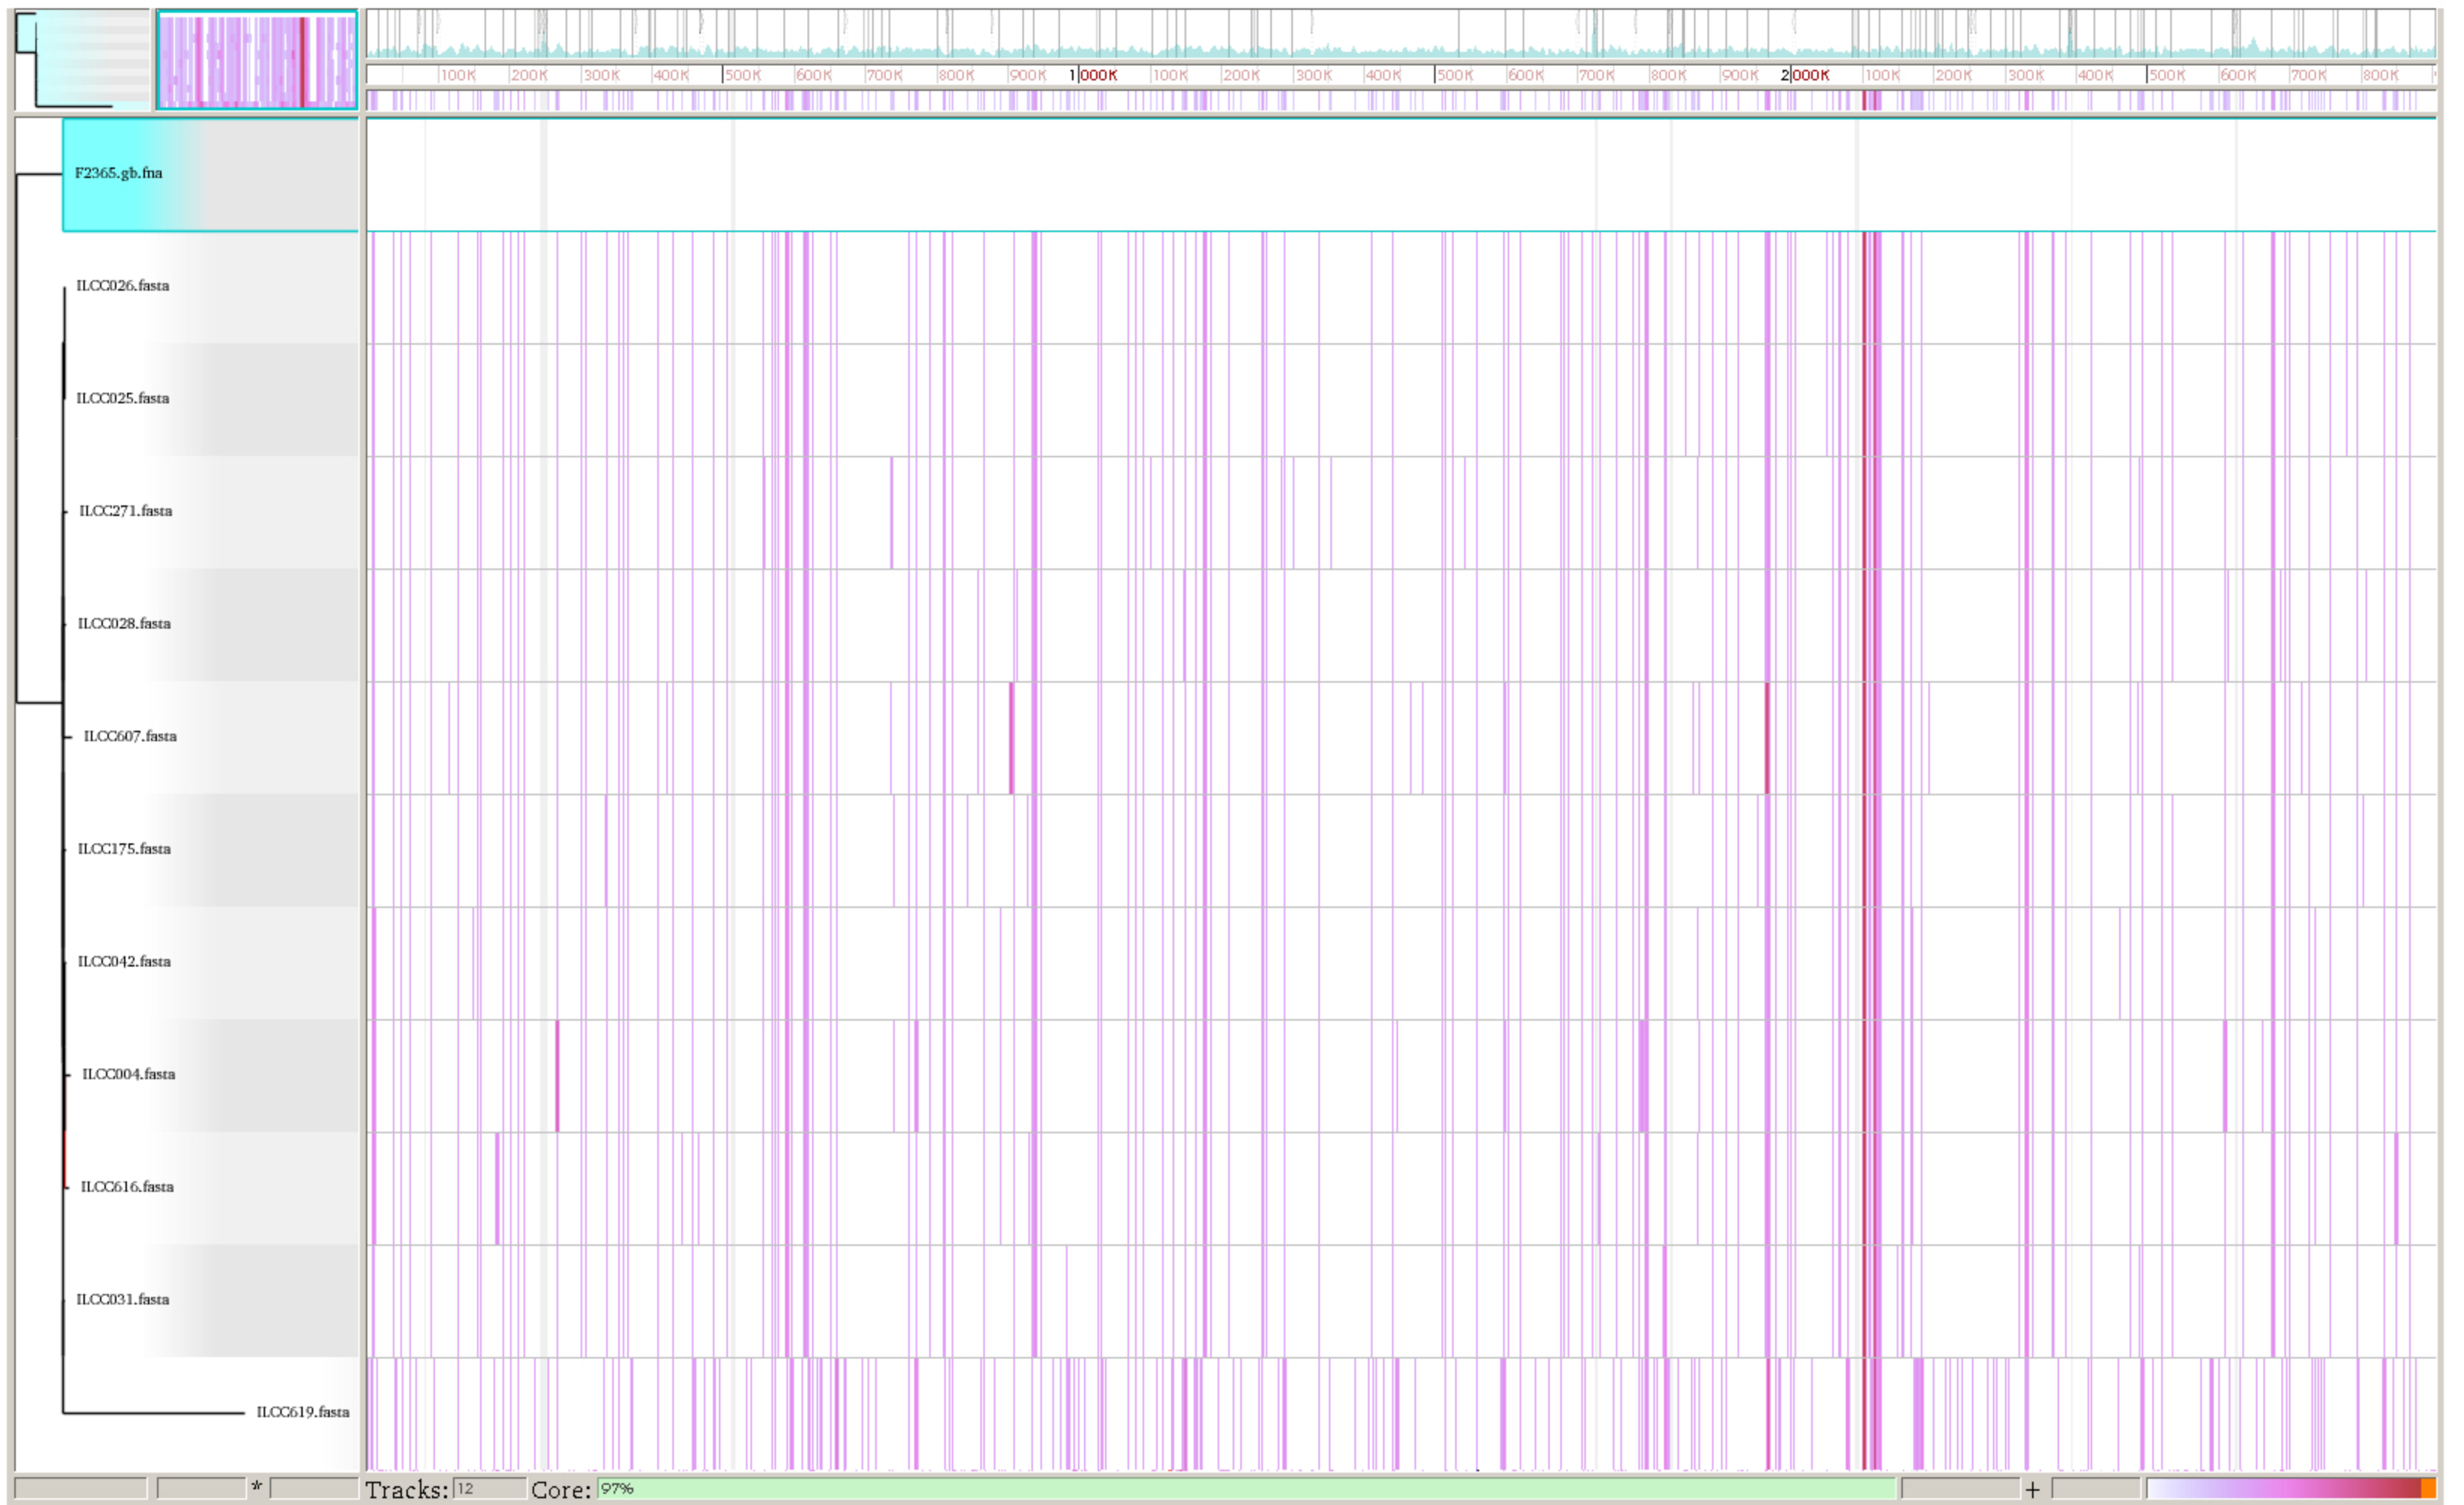

**Supplementary Figure 4.** Portrait of the SNPs across the genomes compared with the standard reference strain *L. monocytogenes* F2365. The mapped SNPs were visualized with the Gingr tool(Ref.1). Compared with F2365, a total of 377 SNPs were observed among the Indian strains. Although an average of 1 SNP per ~8 kb was observed across the genomes, >10 per kb of SNPs were observed near the transposases (marked by the arrow).

1. Treangen TJ, Ondov BD, Koren S, Phillippy AM. The Harvest suite for rapid core-genome alignment and visualization of thousands of intraspecific microbial genomes. *Genome Biol* 2014; 15: 524.
