# Supplementary material for: Presence of a widely disseminated Listeria monocytogenes serotype 4b clone in India
Source: PubMed Central journal article supplement (PMC4932648; doi:10.1038/emi.2016.55), 2016-06-08
Supplement: emi201655x6.pdf [file emi201655x6.pdf]

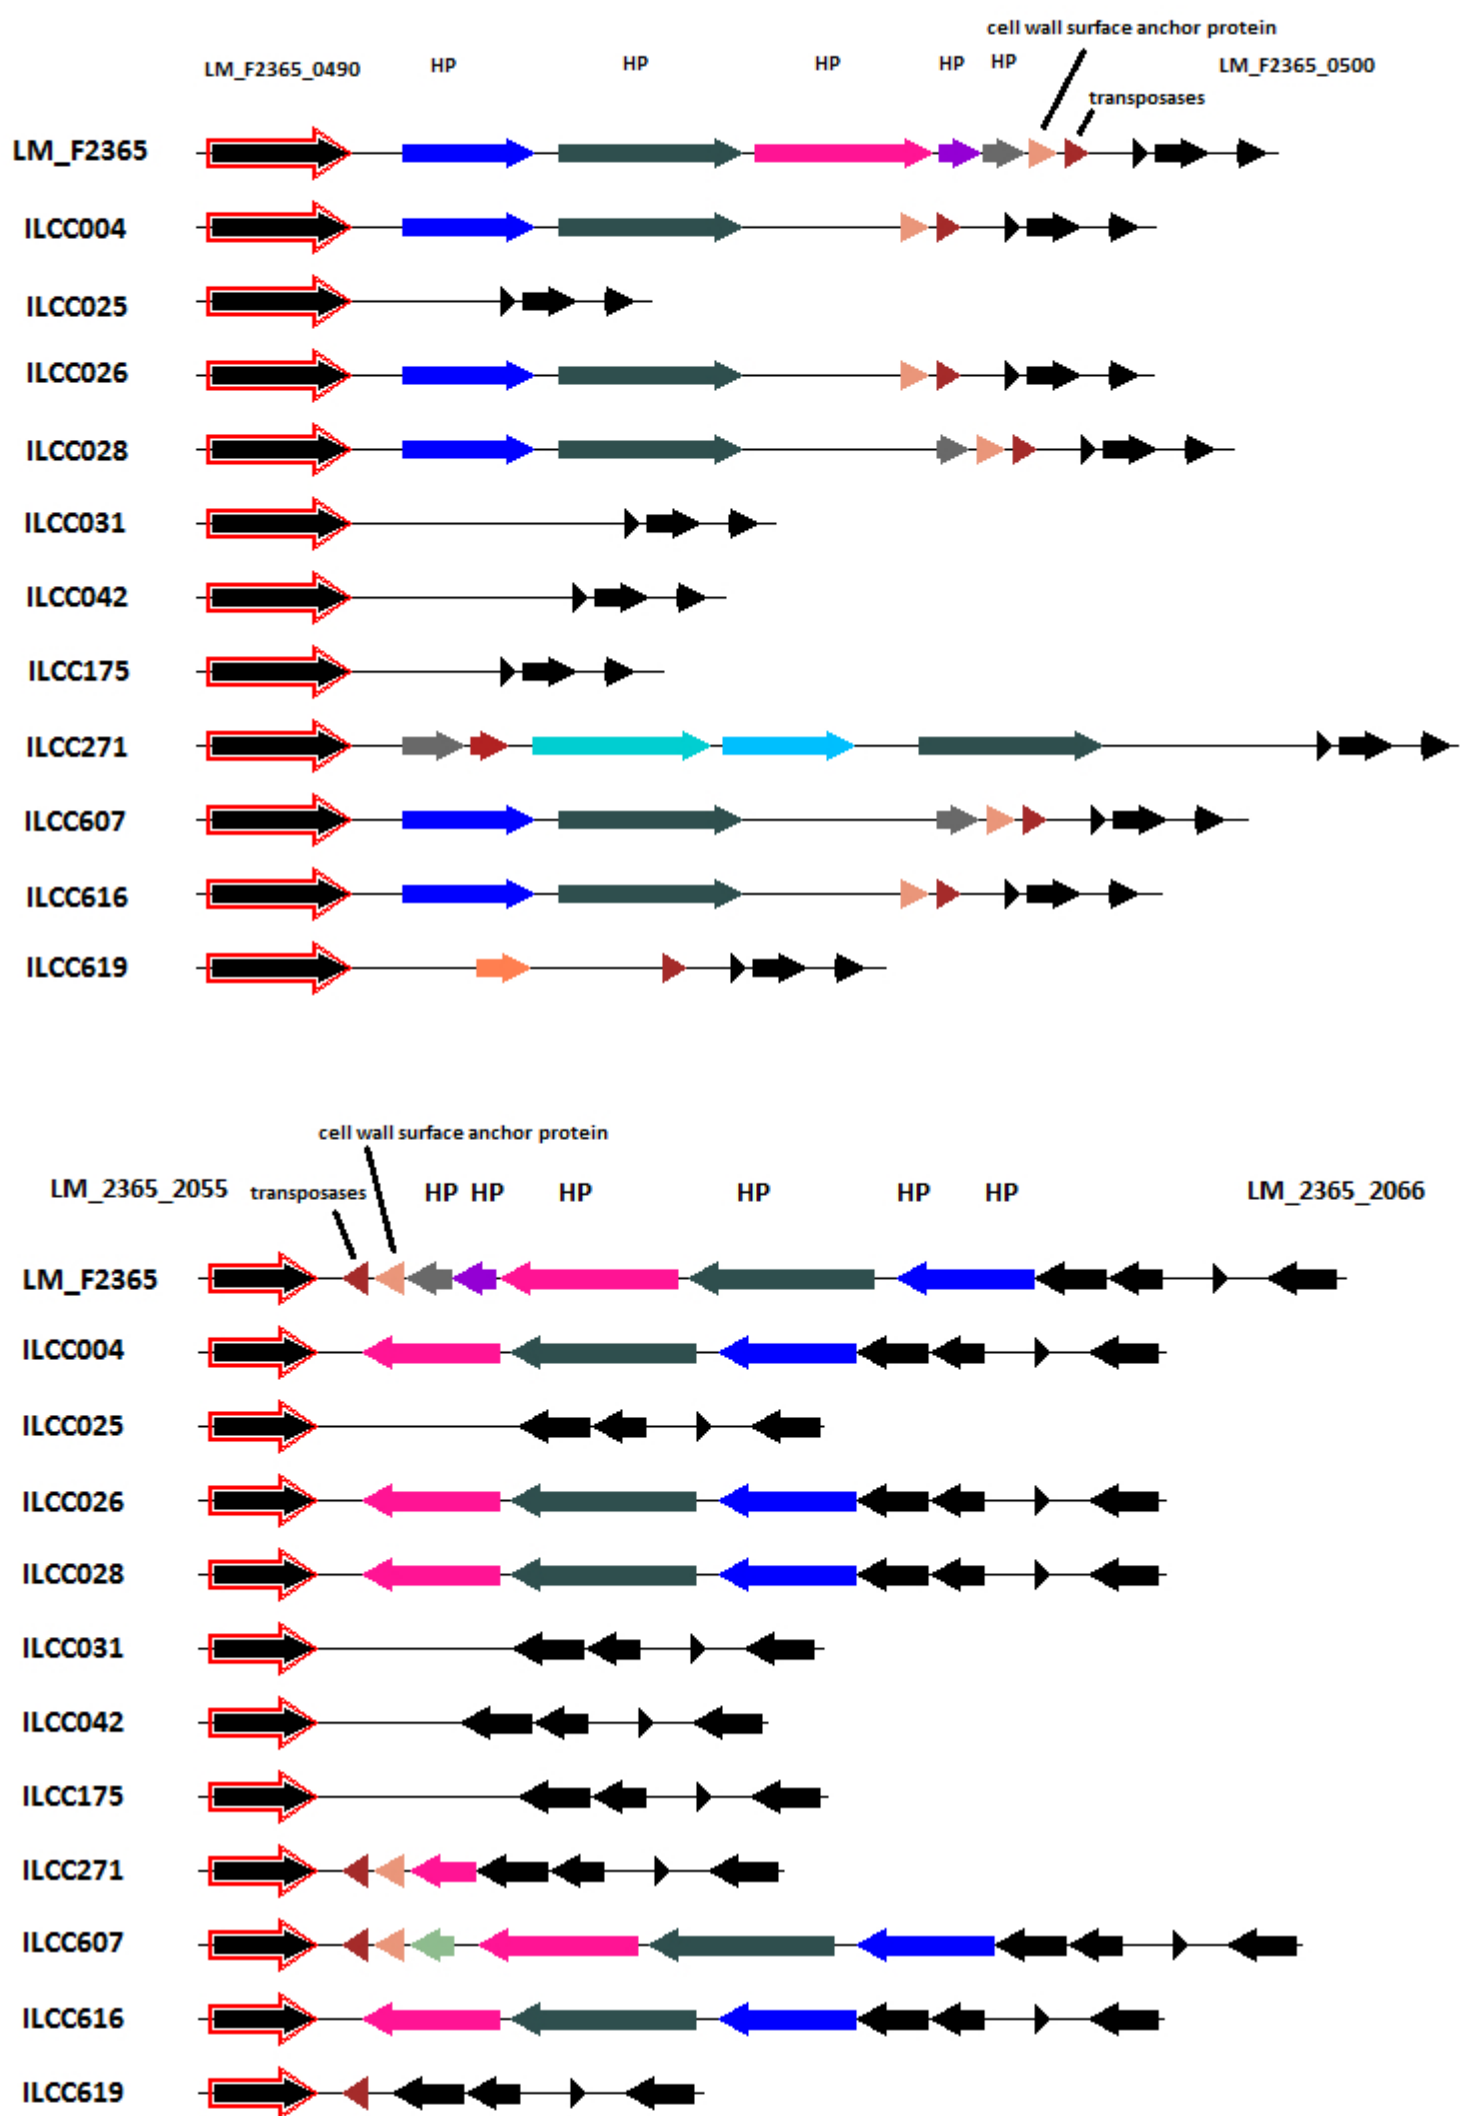

**Supplementary Figure 5.** Depiction of the genetic rearrangements (gene losses and inversions) among the Indian strains compared with the closely related *L. monocytogenes* 4b serotype strain. All of the genomes were analyzed and comparatively visualized with the Genome-Comparisons (GECO) comparative genomic tool. (Ref.1) The regions are pegged at positions F2365\_0490 and F2365\_2055 of *L. monocytogenes* F2365. HP: hypothetical protein.

1. Kuenne CT, Ghai R, Chakraborty T, Hain T. GECO--linear visualization for comparative genomics. *Bioinformatics* 2007; 23: 125–126.
