# Supplementary material for: Presence of a widely disseminated Listeria monocytogenes serotype 4b clone in India
Source: PubMed Central journal article supplement (PMC4932648; doi:10.1038/emi.2016.55), 2016-06-08
Supplement: emi201655x7.pdf [file emi201655x7.pdf]

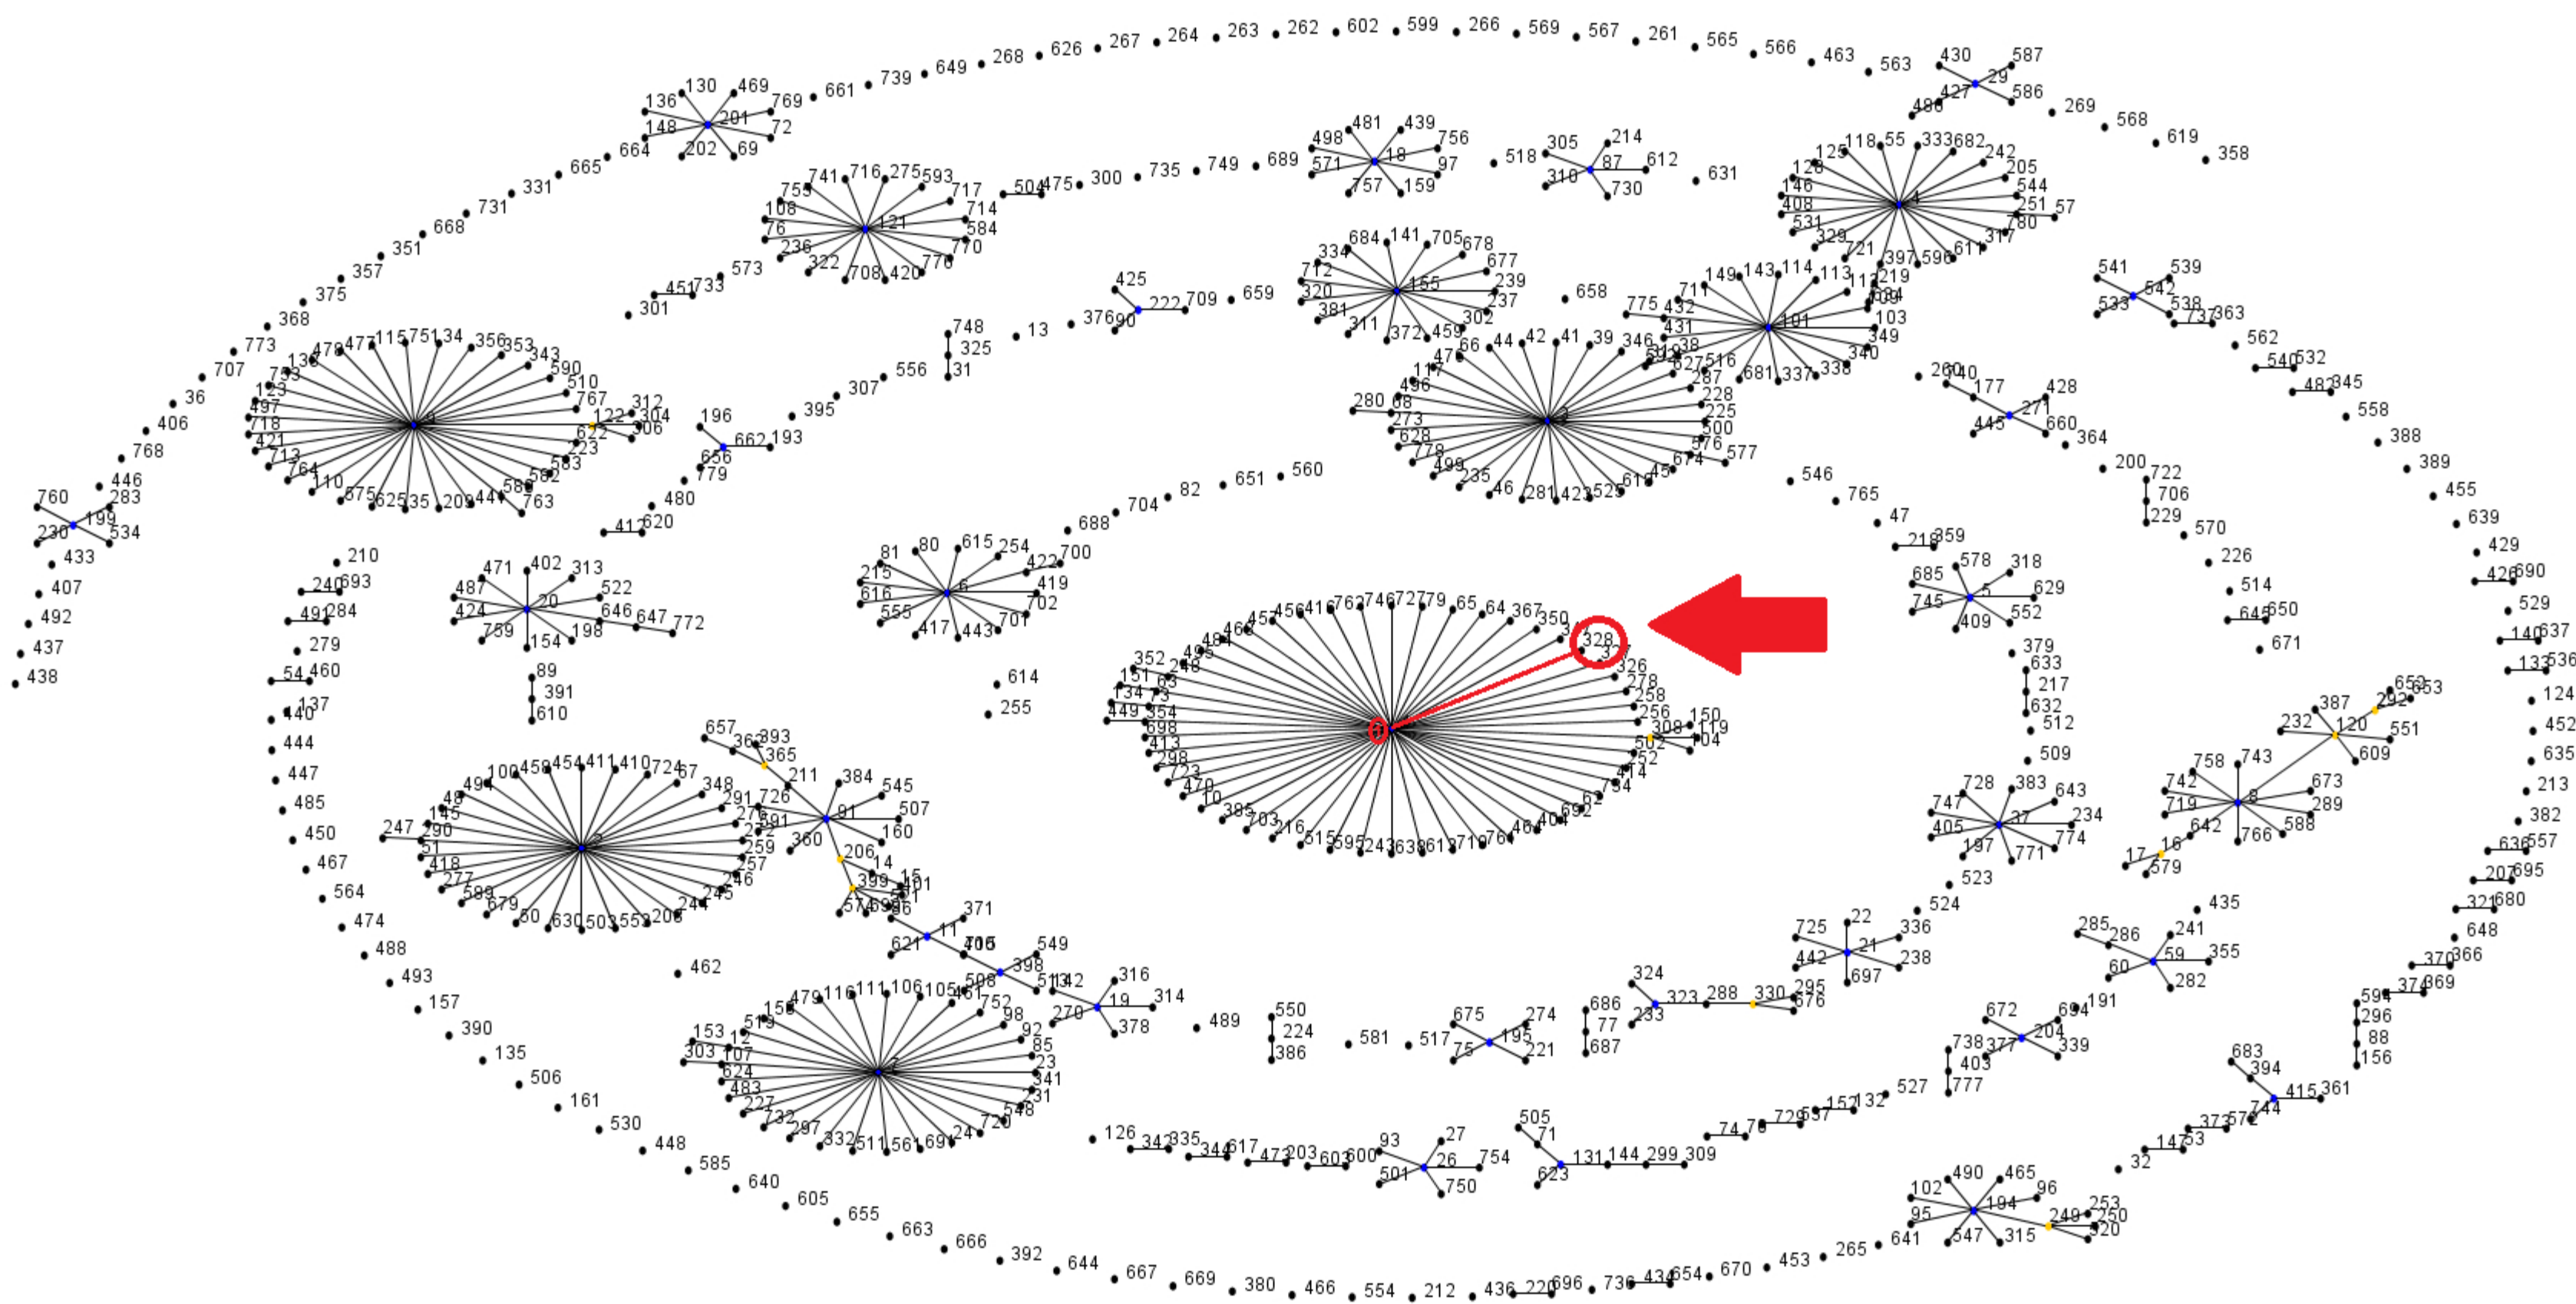

**Supplementary Figure S6.** Portrait of the *L. monocytogenes* population structure based on the MLST types. All of the known MLST types for *L. monocytogenes* (<http://bigsdw.web.pasteur.fr/listeria/listeria.html>) were considered and analyzed with eBURST software (<http://eburst.mlst.net/>). The clonal *L. monocytogenes* serotype 4b strains of India (MLST sequence type 328, 1) among the known *L. monocytogenes* population are marked with red. The MLST type 328 emerged from MLST ST1 (epidemic clone I) via a single locus variation.
